# Supplementary material for: Heteronuclear Ni(ii)–Ln(iii) (Ln = La, Pr, Tb, Dy) complexes: synthesis and single-molecule magnet behaviour
Source: Royal Society of Chemistry journal article supplement (doi:10.1039/c5dt04102c), 2016-01-01
Supplement: c5dt04102c1.pdf [file c5dt04102c1.pdf]

## Electronic supplementary information

### Heteronuclear Ni(II)-Ln(III) (Ln = La, Pr, Tb, Dy) complexes: Synthesis and Single-Molecule Magnet Behaviour

Apoorva Upadhyay,<sup>a</sup> Chinmoy Das,<sup>a</sup> Stuart K Langley,<sup>b</sup> Keith S Murray,<sup>c</sup> Anant K. Srivastava<sup>d</sup>  
and Maheswaran Shanmugam<sup>a\*</sup>

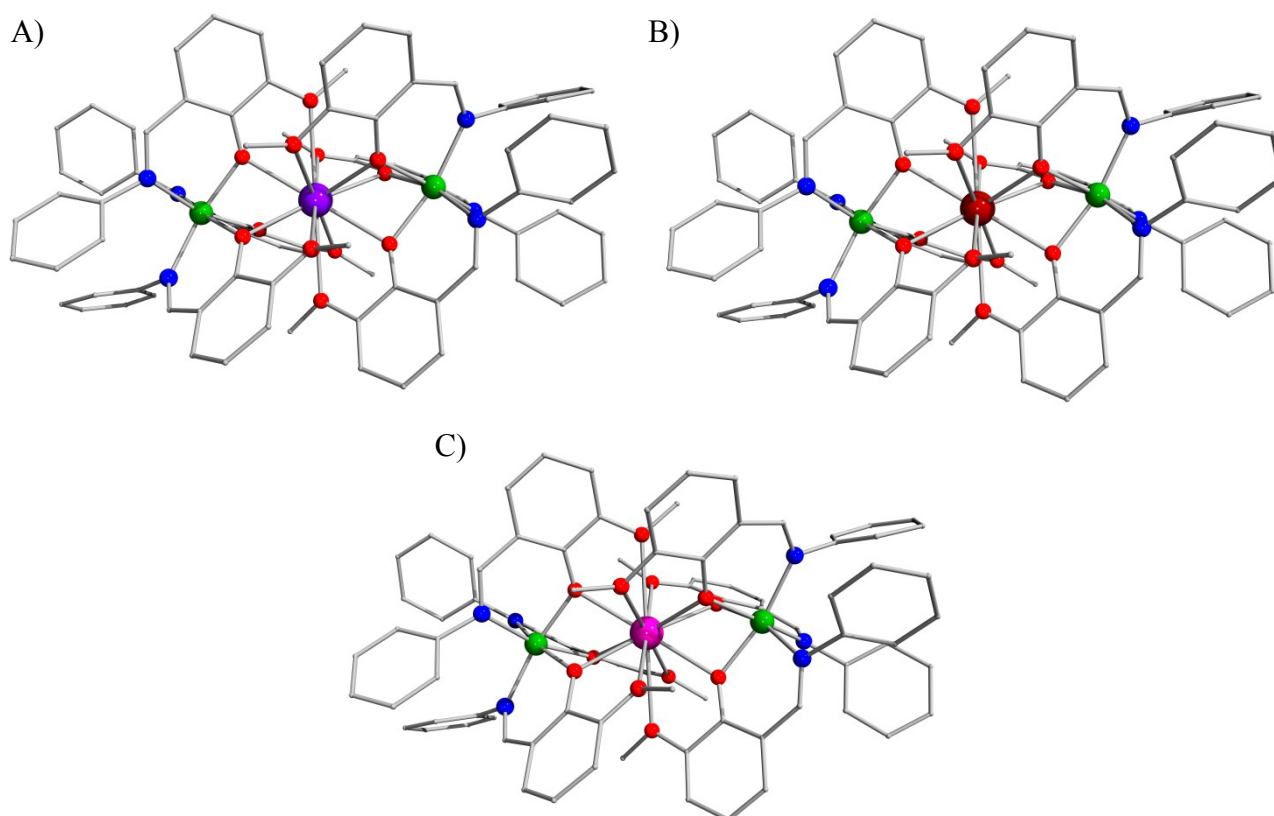

**Figure S1.** Crystal structures of cationic complexes of **1** (panel A), **2** (panel B) and **3** (panel C).

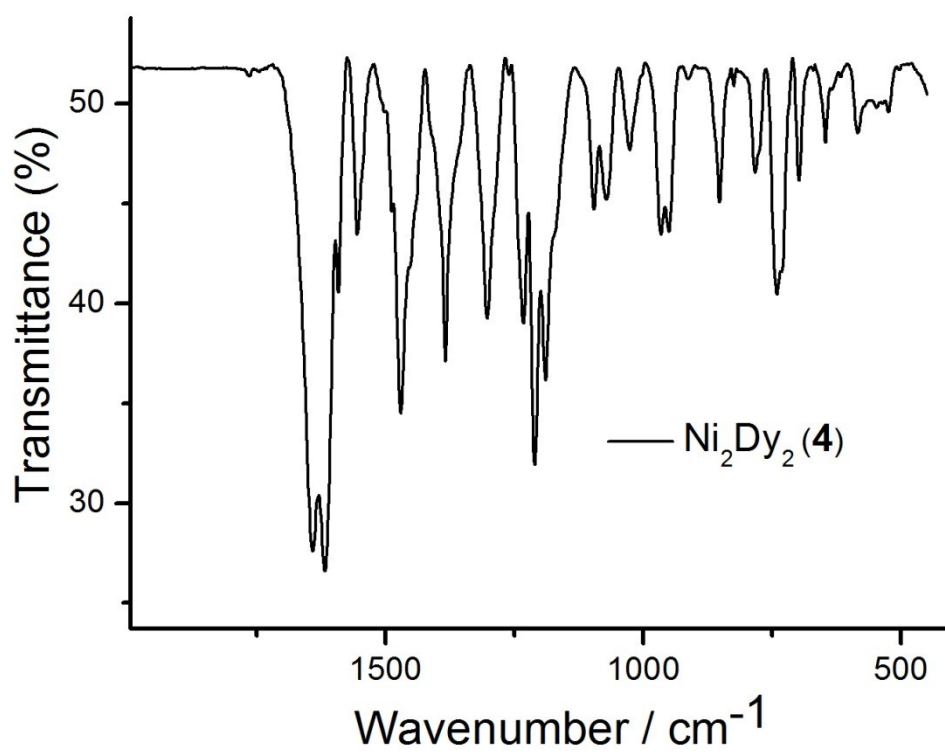

**Figure S2.** Infrared spectrum (KBr pellet) of complex **4**.

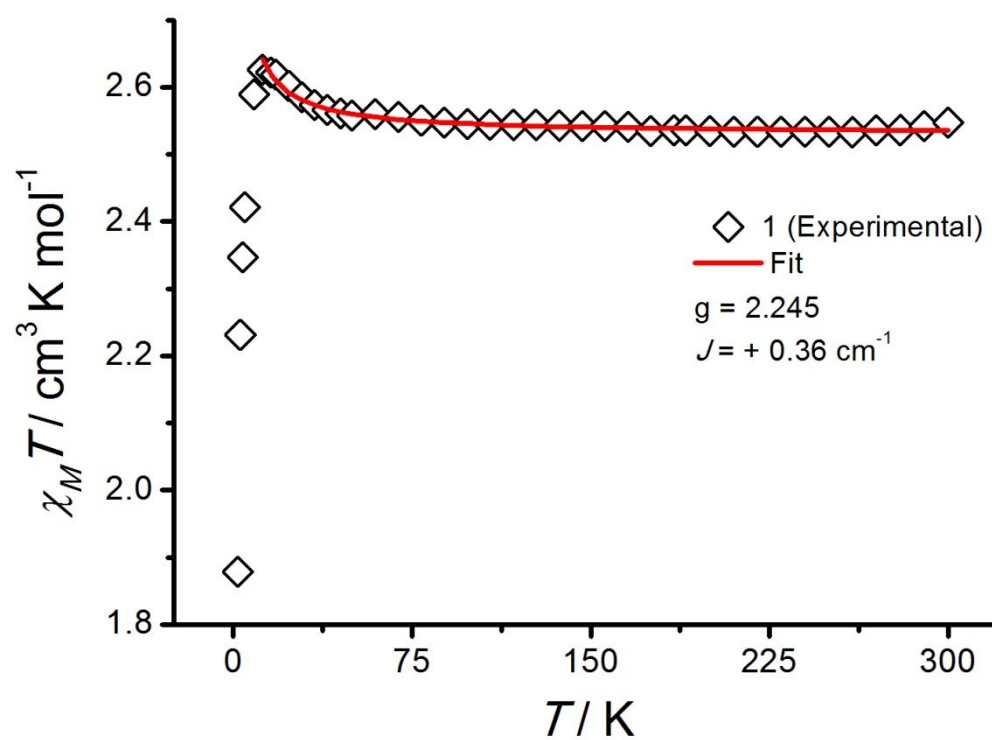

**Figure S3.** Temperature dependent magnetic susceptibility data ( $\chi_M T(T)$ ) of complex **1** measured in the presence of 0.1 Tesla. The red solid indicates the best fit obtained for the parameters ( $g$  and  $J$  without magnetic anisotropy) described in the plot.

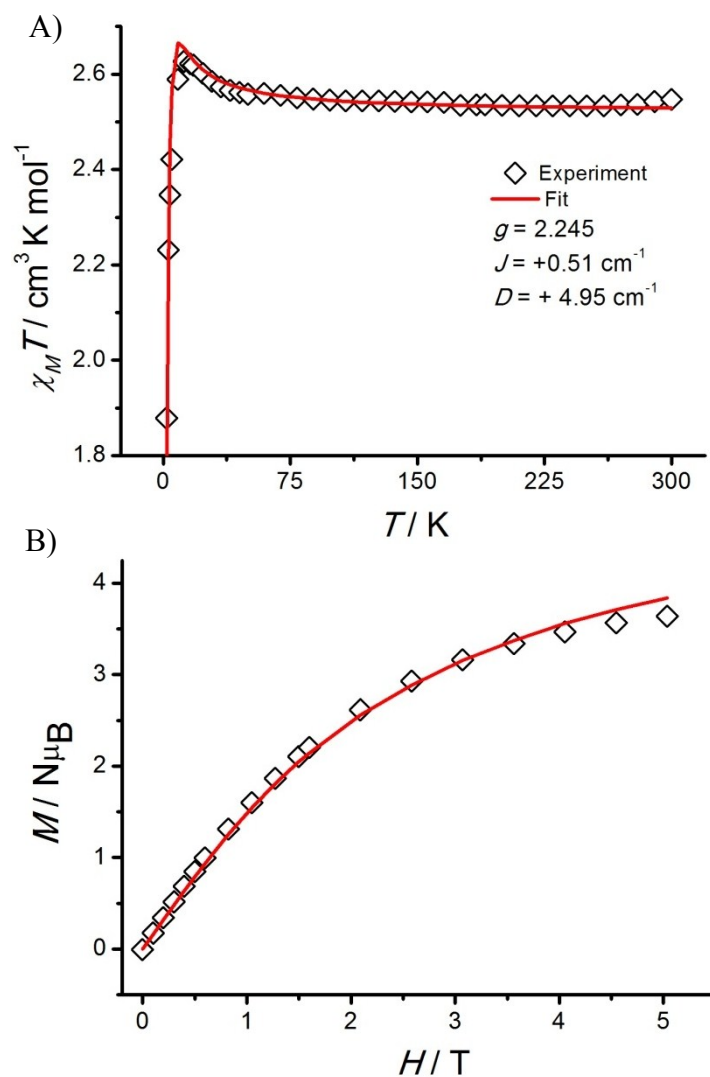

**Figure S4.** A) Temperature dependent magnetic susceptibility data ( $\chi_M T(T)$ ) of complex **1** measured in the presence of 0.1 Tesla. B) Field dependent magnetization measurement of complex **1** measured at 2.0 K. The red solid indicates the best fit (simultaneous fit of  $\chi_M T(T)$  and  $M(H)$  data) obtained for the parameters ( $g$  and  $J$  with magnetic anisotropy) described in the plot.

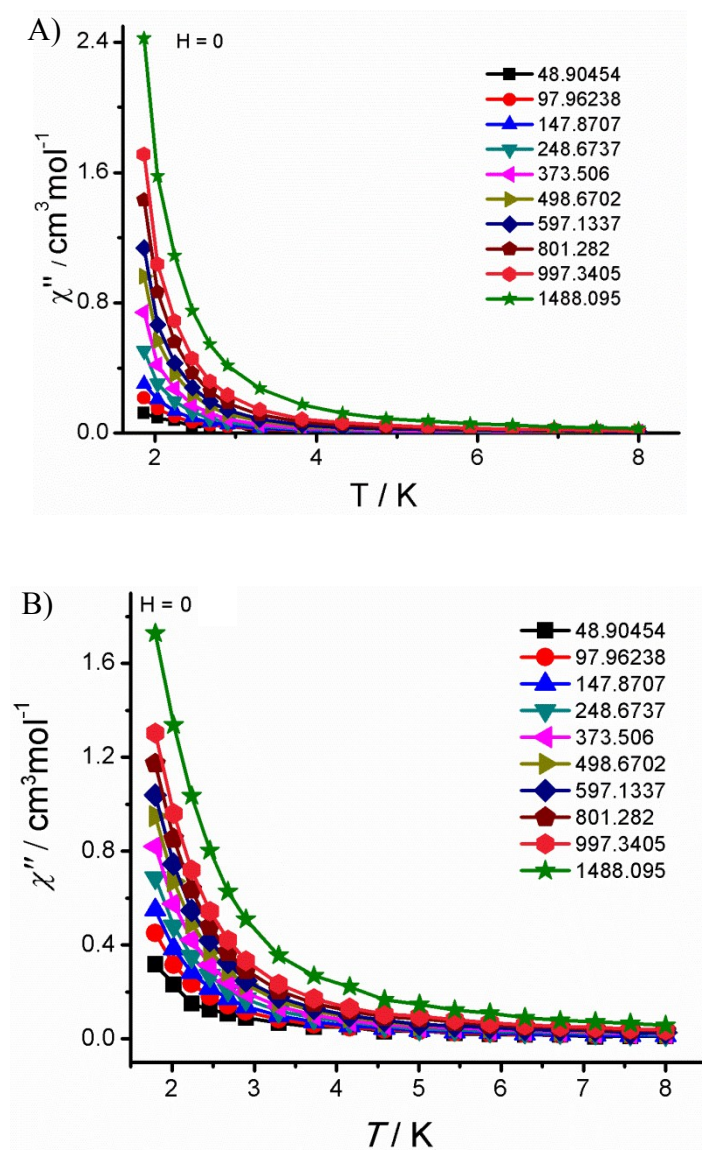

**Figure S5.** Frequency dependent out-of-phase susceptibility signals for complexes **3** (panel A) and **4** (panel B) measured at the indicated frequency in the absence of external magnetic field.

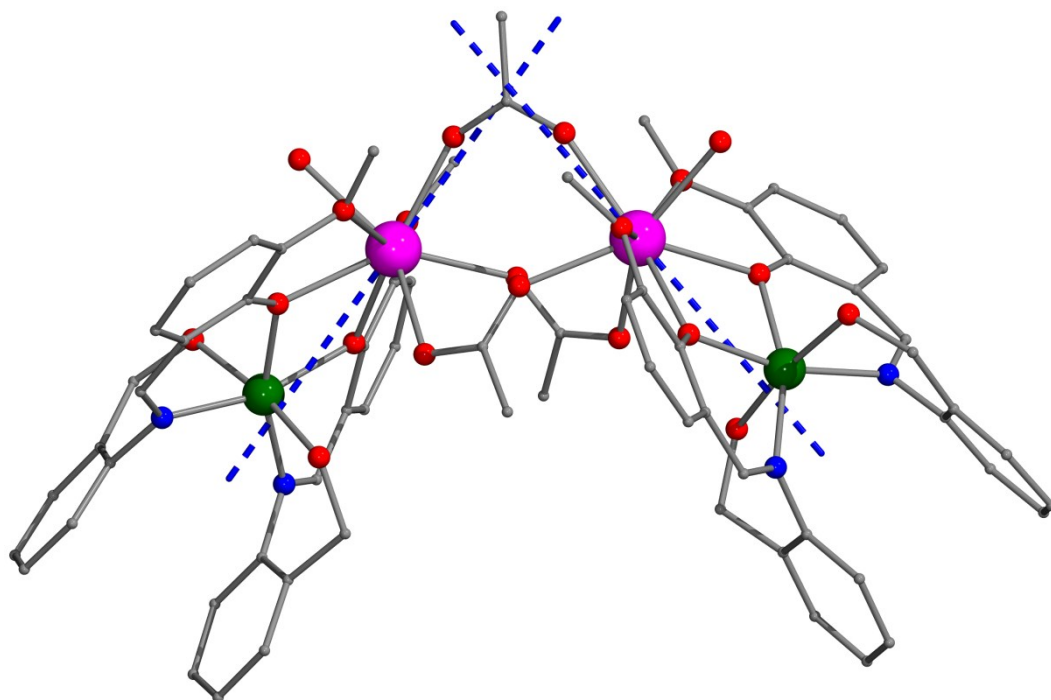

**Figure S6.** Crystal structure of cationic complex of  $\{Ni_2Dy_2\}^{3+}$  is shown which is reported by us elsewhere. The dotted blue line represents the  $g_z$  orientation of the two Dy(III) ions derived from the electrostatic model (refer to main manuscript for details).
